# Supplementary material for: The risk of Alzheimer’s disease according to dynamic changes in metabolic health and obesity: a nationwide population-based cohort study
Source: publisher site journal article supplement (doi:10.18632/aging.203255), 2021-07-08
Supplement: Supplementary file [file aging-v13i13-203255-supplementary-material-SD2.pdf]

## SUPPLEMENTARY TABLES

**Supplementary Table 1. Risk of vascular dementia according to baseline metabolic health and obesity status.**

| Baseline category                               | MHNO                  | MHO                   | MUNO                  | MUO                   |
|-------------------------------------------------|-----------------------|-----------------------|-----------------------|-----------------------|
| BMI                                             | <25 kg/m <sup>2</sup> | ≥25 kg/m <sup>2</sup> | <25 kg/m <sup>2</sup> | ≥25 kg/m <sup>2</sup> |
| Metabolic health status                         | 0–1 risk factors      | 0–1 risk factors      | ≥2 risk factors       | ≥2 risk factors       |
| <i>n</i> (% of total)                           | 33, 049 (17.4)        | 10, 445 (5.5)         | 53, 958 (28.4)        | 39, 395 (20.8)        |
| Number of events (%)                            | 232 (0.70)            | 66 (0.63)             | 534 (0.99)            | 332 (0.84)            |
| Crude HR (95% CI)                               | 1 (ref)               | 0.89 (0.68–1.17)      | 1.43 (1.22–1.67)      | 1.19 (1.01–1.41)      |
| Multivariable-adjusted HR (95% CI) <sup>a</sup> | 1 (ref)               | 0.87 (0.67–1.15)      | 1.41 (1.21–1.64)      | 1.17 (0.99–1.38)      |

<sup>a</sup>Adjusted for baseline age, sex, income, smoking, alcohol drinking, and physical activities.

Abbreviations: MHO: stable metabolically healthy obesity; MUO: metabolically unhealthy obesity; MUNO: metabolically unhealthy obesity; MHNO: metabolically healthy non-obesity.

**Supplementary Table 2. Risk of vascular dementia according to transitions of metabolic health and obesity status.**

| Baseline category                               | MHNO             |                  |                  |                  |
|-------------------------------------------------|------------------|------------------|------------------|------------------|
| Follow-up category                              | MHNO             | MHO              | MUNO             | MUO              |
| <i>n</i> (% of baseline category)               | 17, 812 (63.0)   | 994 (3.5)        | 8, 590 (30.4)    | 866 (3.1)        |
| Number of events (%)                            | 83 (0.47)        | 6 (0.60)         | 76 (0.88)        | 8 (0.92)         |
| Crude HR (95% CI)                               | 1 (ref)          | 1.29 (0.56–2.94) | 1.92 (1.41–2.62) | 1.97 (0.96–4.08) |
| Multivariable-adjusted HR (95% CI) <sup>a</sup> | 1 (ref)          | 1.28 (0.56–2.93) | 1.89 (1.39–2.58) | 1.95 (0.95–4.04) |
| Baseline category                               | MHO              |                  |                  |                  |
| Follow-up category                              | MHNO             | MHO              | MUNO             | MUO              |
| <i>n</i> (% of baseline category)               | 1, 095 (12.1)    | 3, 780 (41.8)    | 653 (7.2)        | 3, 514 (38.9)    |
| Number of events (%)                            | 4 (0.37)         | 15 (0.40)        | 2 (0.31)         | 17 (0.48)        |
| Crude HR (95% CI)                               | 0.78 (0.28–2.12) | 0.84 (0.49–1.46) | 0.66 (0.16–2.67) | 1.03 (0.61–1.74) |
| Multivariable-adjusted HR (95% CI) <sup>a</sup> | 0.77 (0.28–2.10) | 0.84 (0.48–1.45) | 0.65 (0.16–2.64) | 1.01 (0.60–1.70) |
| Baseline category                               | MUNO             |                  |                  |                  |
| Follow-up category                              | MHNO             | MHO              | MUNO             | MUO              |
| <i>N</i> (% of baseline category)               | 9, 211 (20.4)    | 623 (1.4)        | 31, 657 (70.1)   | 3, 665 (8.1)     |
| Number of events (%)                            | 55 (0.60)        | 5 (0.80)         | 277 (0.88)       | 30 (0.82)        |
| Crude HR (95% CI)                               | 1.28 (0.91–1.80) | 1.72 (0.70–4.24) | 1.90 (1.49–2.43) | 1.78 (1.17–2.70) |
| Multivariable-adjusted HR (95% CI) <sup>a</sup> | 1.26 (0.90–1.78) | 1.69 (0.69–4.18) | 1.88 (1.47–2.40) | 1.74 (1.14–2.64) |
| Baseline category                               | MUO              |                  |                  |                  |
| Follow-up category                              | MHNO             | MHO              | MUNO             | MUO              |
| <i>n</i> (% of baseline category)               | 1, 039 (3.1)     | 3, 568 (10.6)    | 4, 797 (14.3)    | 24, 110 (71.9)   |
| Number of events (%)                            | 6 (0.58)         | 19 (0.53)        | 46 (0.96)        | 153 (0.63)       |
| Crude HR (95% CI)                               | 1.23 (0.54–2.83) | 1.12 (0.68–1.85) | 2.07 (1.44–2.96) | 1.36 (1.04–1.78) |
| Multivariable-adjusted HR (95% CI) <sup>a</sup> | 1.22 (0.53–2.79) | 1.11 (0.67–1.83) | 2.02 (1.41–2.90) | 1.33 (1.02–1.74) |

<sup>a</sup>Adjusted for baseline age, sex, income, smoking, alcohol drinking, and physical activities.

Abbreviations: MHO: stable metabolically healthy obesity; MUO: metabolically unhealthy obesity; MUNO: metabolically unhealthy obesity; MHNO: metabolically healthy non-obesity.
